# Supplementary material
Source: publisher figshare collection journal article supplement (https://acs.figshare.com/ndownloader/files/5277100)
Supplement: Supplementary file 1 [file 5277100]

# Supporting Information for Molecular Mechanism of Ionic Liquid Induced Membrane Disruption: Morphological Changes to Bilayers, Multi-Layers and Vesicles

Brian Yoo,<sup>†</sup> Yingxi Zhu,<sup>‡</sup> and Ed Maginn<sup>\*,†</sup>

*Department of Chemical and Biomolecular Engineering, University of Notre Dame, 182  
Fitzpatrick Hall, Notre Dame, IN 46556-5637, and Department of Chemical Engineering and  
Materials Science, Wayne State University, 5050 Anthony Wayne Drive, Detroit, MI 48202*

E-mail: ed@nd.edu

---

\*To whom correspondence should be addressed

<sup>†</sup>University of Notre Dame

<sup>‡</sup>Wayne State University

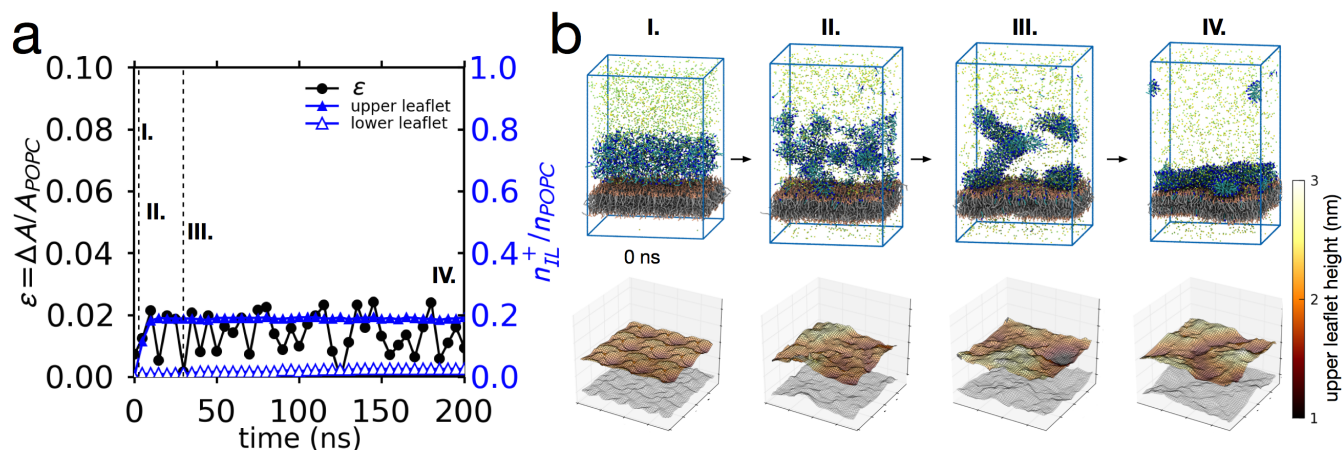

Figure S1 (a) Leaflet strain parameter and (b) snapshots from simulation of a POPC planar bilayer with  $[C_{10}mim]Cl$ . Cations rapidly form spherical micelles while a relatively small number of cations insert into the the top and bottom leaflet (II). The spherical micelles further fuse to form larger cylindrically shaped aggregates with a few of them coming into contact with the bilayer surface (III). After contact, IL cationic aggregates completely adsorb onto the bilayer surface. The leaflet strain parameter does not show signs of significant increase during course of the simulation. Cation insertion isotherms for (a) in the top and bottom leaflet are represented by the blue filled and open triangles respectively. Surface contour plots of the upper bilayer leaflet height (nm) corresponding to each simulation snapshot (I-IV) shown in (b) are plotted.

Table S1 Simulation conditions for each of the studied systems including: the system bilayer morphology, IL cation chain length ( $n$ ), number of lipids ( $N_{POPC}$ ), number of water beads ( $N_W$ ), number of IL cations ( $N_{IL+}$ ), number of chloride ion beads ( $N_{Cl-}$ ), number of sodium ion beads ( $N_{Na+}$ ), final box dimension (in nm), and pressure coupling type.

| system  | $n$ | $N_{POPC}$ | $N_W$  | $(N_{IL+})$ | $N_{Cl-}$ | $N_{Na+}$ | $(L_x * L_y * L_z)$    | pressure couple |
|---------|-----|------------|--------|-------------|-----------|-----------|------------------------|-----------------|
| planar  | 4   | 1152       | 87000  | 1000        | 1800      | 800       | $(20.9 * 20.9 * 21.9)$ | semi-isotropic  |
| planar  | 10  | 1152       | 87000  | 1000        | 1800      | 800       | $(18.4 * 18.4 * 28.7)$ | semi-isotropic  |
| double  | 4   | 2304       | 96000  | 2000        | 2800      | 800       | $(17.6 * 17.6 * 38.2)$ | semi-isotropic  |
| vesicle | 4   | 1512       | 151200 | 1600        | 2900      | 1300      | $(25.2 * 25.2 * 25.2)$ | isotropic       |
| disk    | 10  | 1152       | 87000  | 1000        | 1800      | 800       | $(13.9 * 13.9 * 50.4)$ | semi-isotropic  |
